# Supplementary material
Source: PubMed Central journal article supplement (PMC6221992)

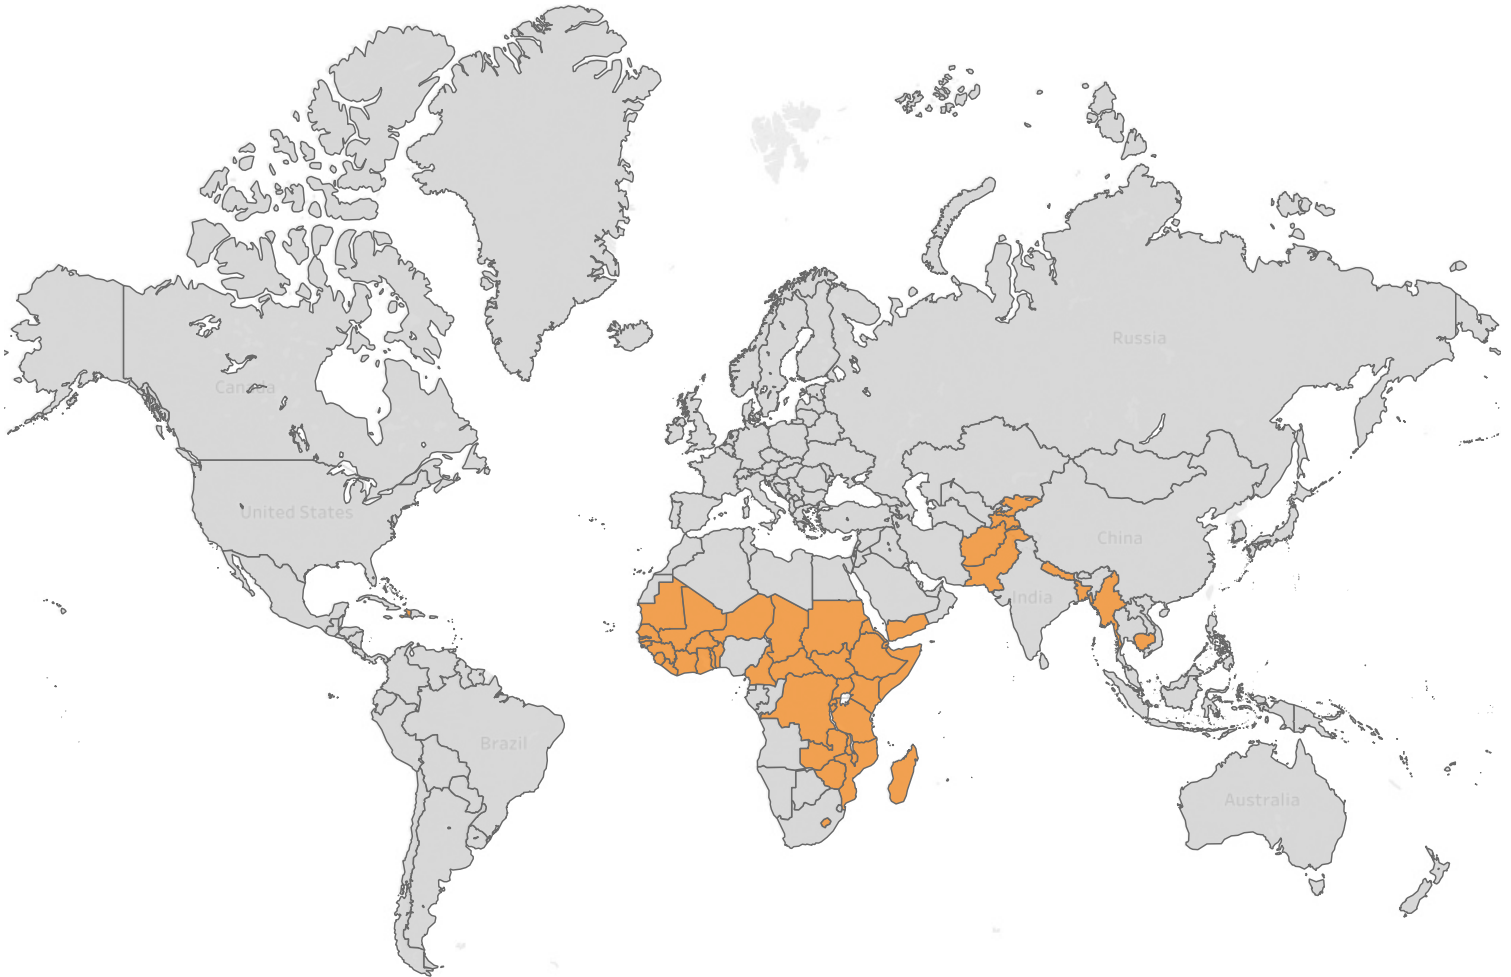

Supplement: NIHMS986777-supplement-Supp_figS1.pdf [file NIHMS986777-supplement-Supp_figS1.pdf]

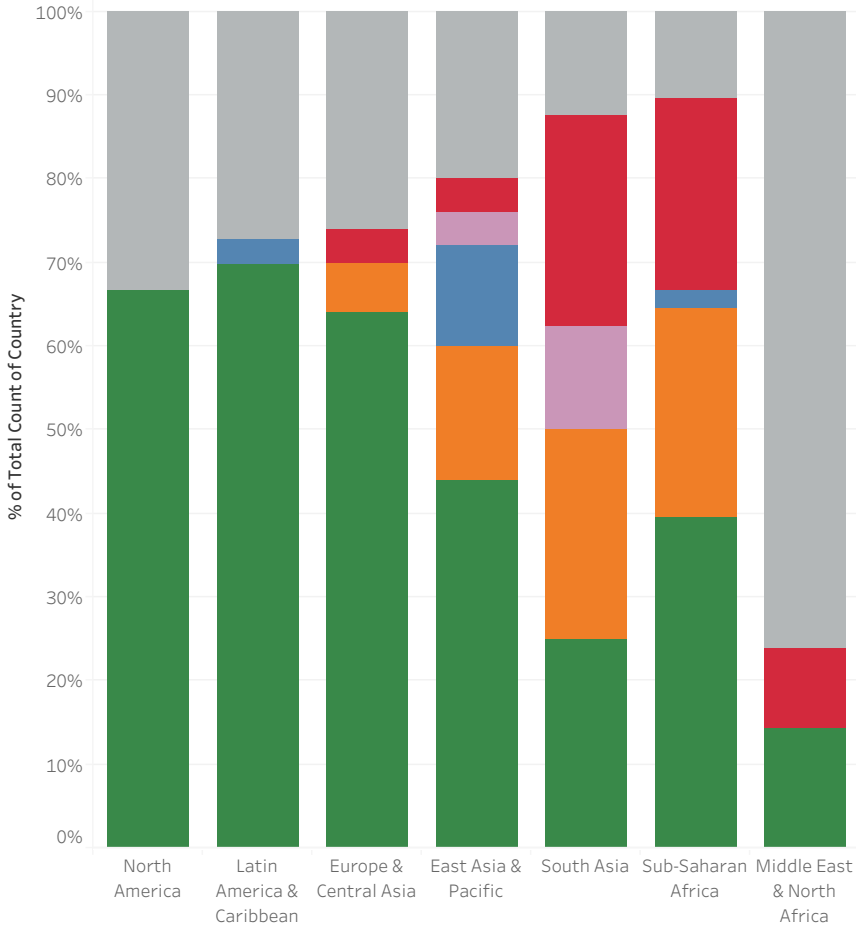

Supplement: NIHMS986777-supplement-Supp_figS2.pdf [file NIHMS986777-supplement-Supp_figS2.pdf]

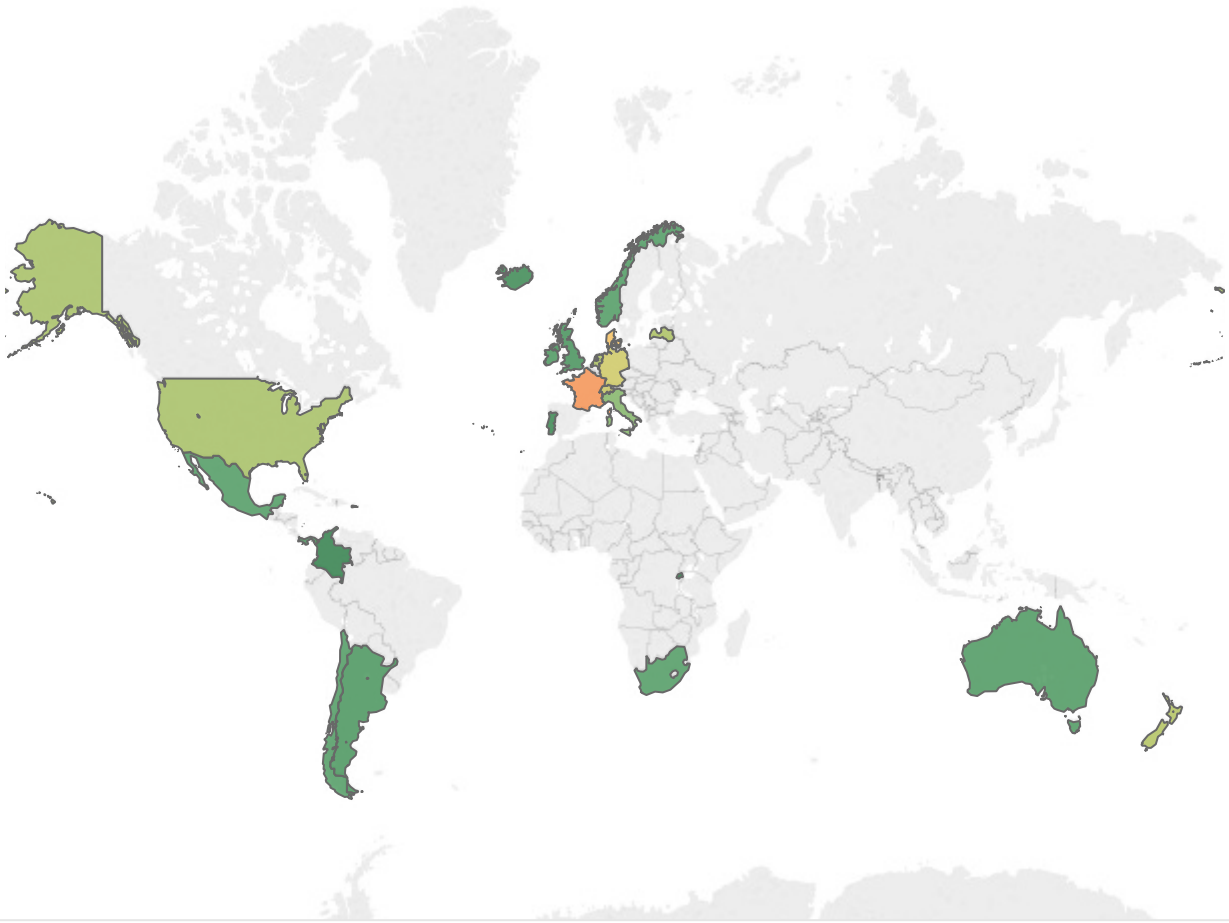

Supplement: NIHMS986777-supplement-Supp_figS3.pdf [file NIHMS986777-supplement-Supp_figS3.pdf]
